# Supplementary material for: FRET-based probe for fluoride based on a phosphorescent iridium(iii) complex containing triarylboron groups
Source: Royal Society of Chemistry journal article supplement (doi:10.1039/c1jm00071c), 2011-01-01
Supplement: c1jm00071c.pdf [file c1jm00071c.pdf]

## Electronic Supplementary Information (ESI):

### FRET-based probe for fluoride based on phosphorescent iridium(III) complex containing triarylboron groups

Wenjuan Xu, Shujuan Liu, Huibin Sun, Xinyan Zhao, Qiang Zhao,\* Shi Sun, Shan Cheng, Tingchun Ma, Lixia Zhou and Wei Huang\*

#### 1. Response of UV-vis absorption spectra of 1 to various anions

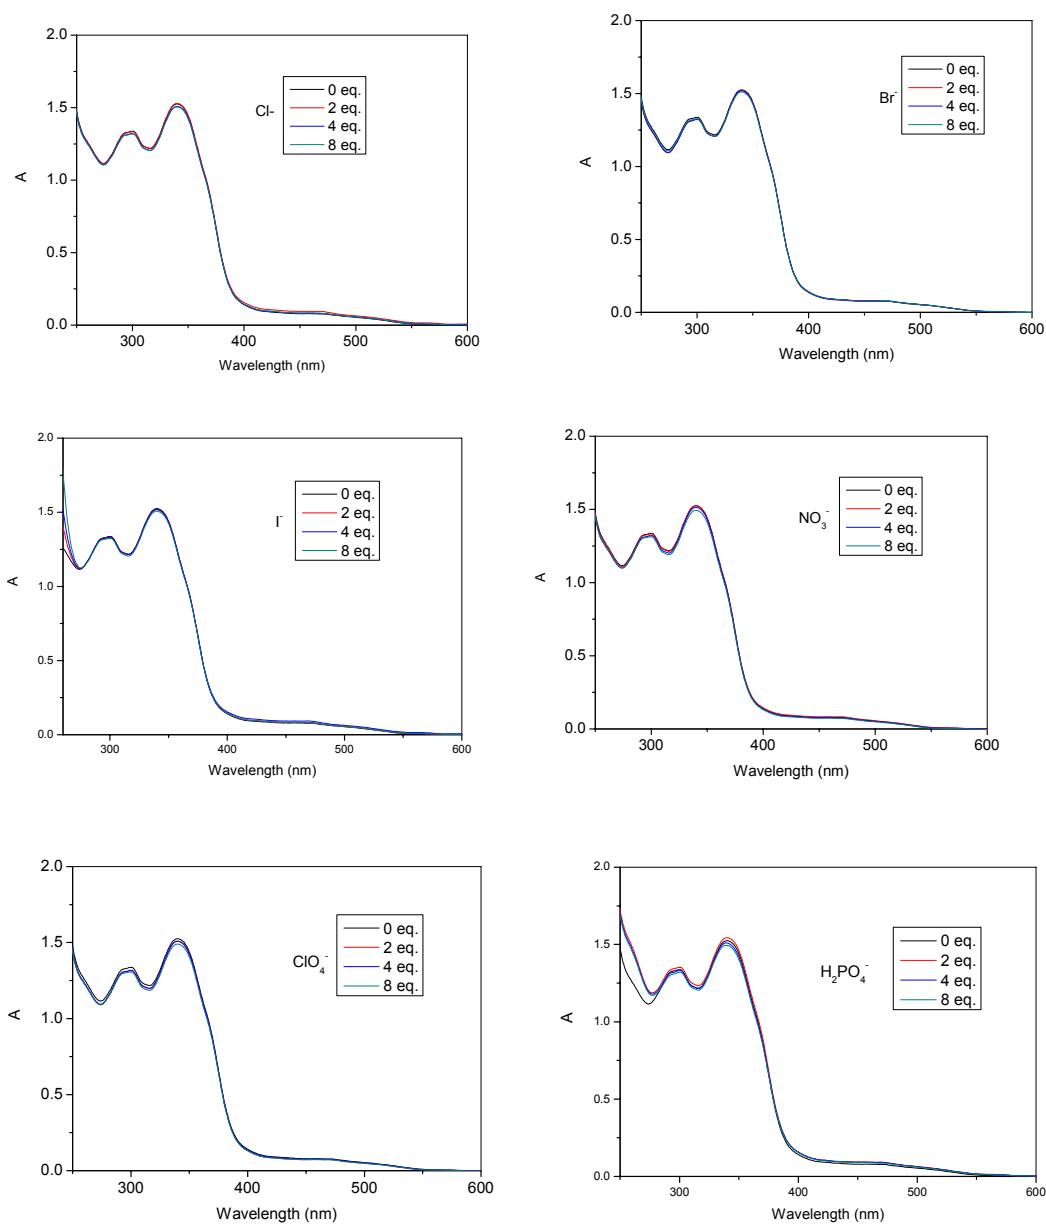

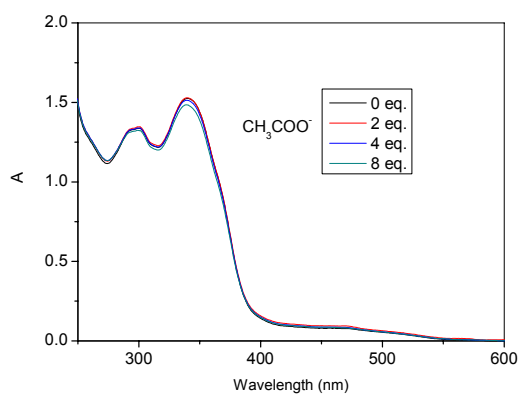

**Fig. S1** Response of UV-vis absorption spectra of **1** (20 μM) in CH<sub>2</sub>Cl<sub>2</sub> solution to various anions.

## 2. Response of PL spectra of **1** to various anions

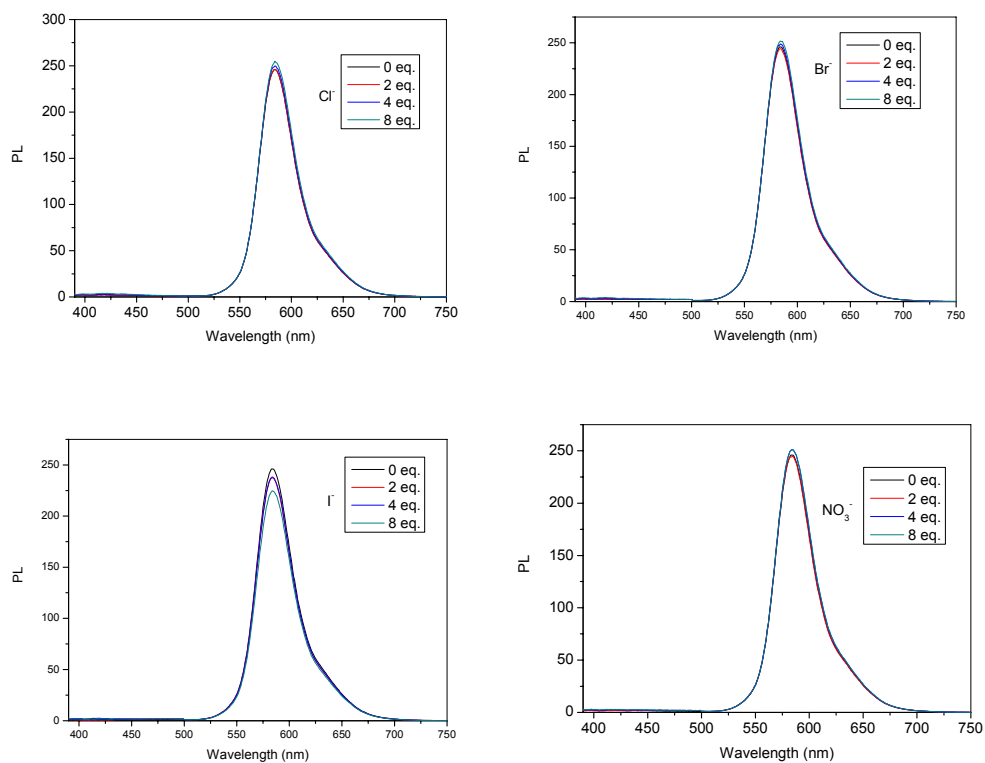

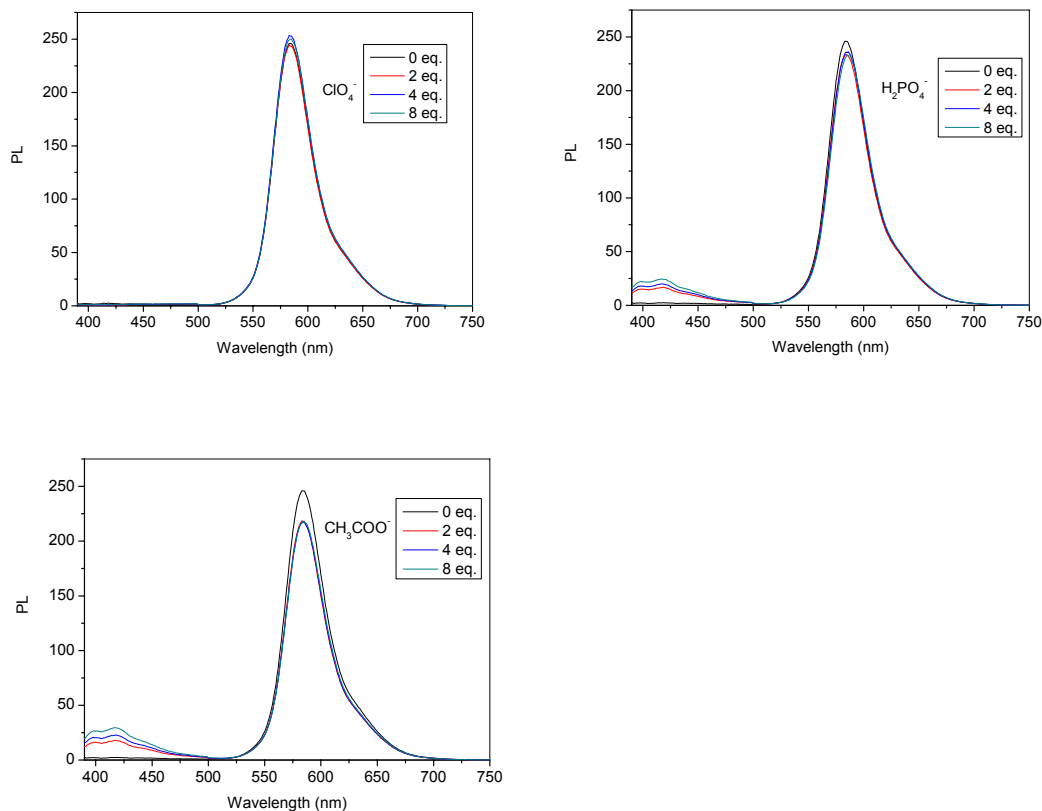

**Fig. S2** Response of PL spectra of **1** (20 μM) in CH<sub>2</sub>Cl<sub>2</sub> solution to various anions,  $\lambda_{\text{ex}} = 383 \text{ nm}$ .

### 3. Calculations of F<sup>-</sup> binding constant

The stability constants for the binding of one and two fluoride ions to **1** (H) in CH<sub>3</sub>CN were determined from the UV-vis titration data. (K.A. Connors, Binding Constants: The Measurement of Molecular Complex Stability Constants, John Wiley and Sons, 1987, p. 161).

$$\Delta A = \frac{[H](K_1 \Delta \epsilon_{11} [F^-] + K_1 K_2 \Delta \epsilon_{12} [F^-]^2)}{1 + K_1 [F^-] + K_1 K_2 [F^-]^2}$$

$$[F^-] = \frac{[H](K_1 [F^-] + 2K_1 K_2 [F^-]^2)}{1 + K_1 [F^-] + K_1 K_2 [F^-]^2}$$

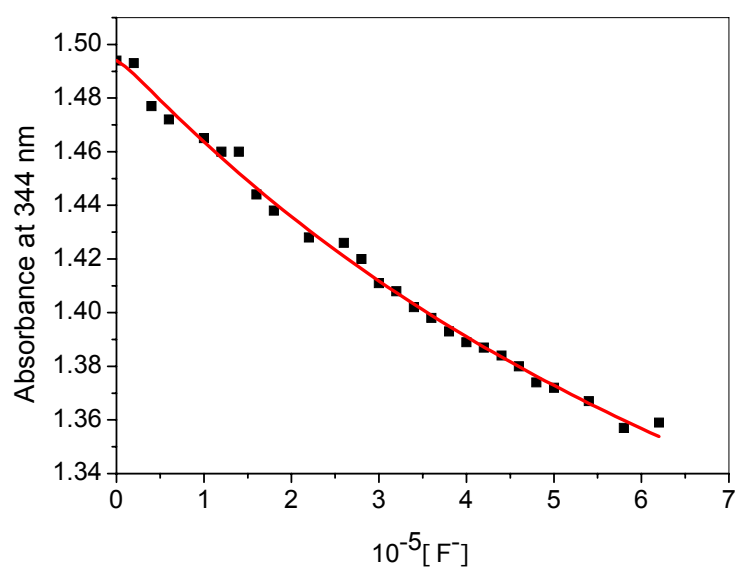

**Fig. S3** Titration of **1** in CH<sub>2</sub>Cl<sub>2</sub> ( $2.0 \times 10^{-5}$  M) with F<sup>-</sup> in CH<sub>3</sub>CN, monitored at 344 nm. Solid line represents fit with  $K_1 = 8.31 \times 10^5$ ,  $K_2 = 9.00 \times 10^3$ .
